# Supplementary material
Source: publisher site journal article supplement (https://www.spandidos-publications.com/1581/downloadSupplementary)

Figure S1. Transfection efficiency of miR-187-3p mimic and inhibitor. (A) miR-187-3p mimic increased the expression of miR-187-3p compared with mimic NC group in the absence of any other treatment. (B) miR-187-3p inhibitor decreased the expression of miR-187-3p compared with inhibitor NC group in the absence of any other treatment. Data are presented as the mean  $\pm$  SD; n=3/group. \*\*P<0.01. miR-187-3p, microRNA-187-3p; NC, negative control; rno, *Rattus norvegicus*.

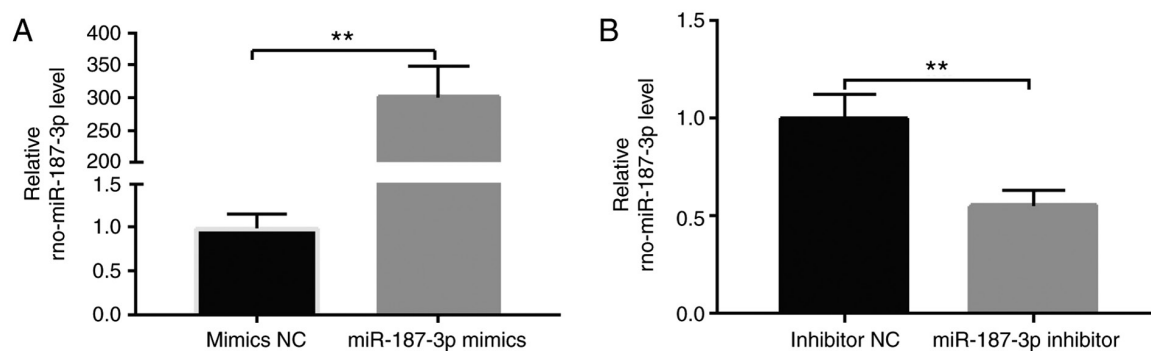

Supplement: Supplementary file 1 [file downloadSupplementary]
